# Supplementary material for: Effects of ZnO Nanoparticle on the Gas Separation Performance of Polyurethane Mixed Matrix Membrane
Source: Membranes (Basel). 2017 Aug 11;7(3):43. doi: 10.3390/membranes7030043 (PMC5618128; doi:10.3390/membranes7030043)
Supplement: Supplementary File 1 [file membranes-07-00043-s001.pdf]

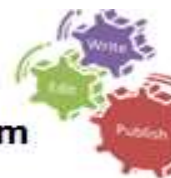

## EDITORIAL CERTIFICATE LETTER

---

This document is to certify that the manuscript listed below was edited for proper English language, grammar, punctuation, spelling, and overall style by one of the highly qualified subject-expert native English speaking editors at **NativeEnglishEdit.com**

The substantive content of the article mentioned below remains the full responsibility of the author/authors:

TITLE OF ARTICLE:

EFFECTS OF ZNO NANOPARTICLE ON THE GAS SEPARATION PERFORMANCE OF POLYURETHANE MIXED MATRIX MEMBRANE

AUTHOR(S):

BANAFSHEH SOLTANI, MORTEZA ASGHARI

REFER CODE:

EE-1396-3334297-SOLTANI BANAFSHE 25103-1

---

Documents receiving this certification should be English-ready for publication; however, the author has the ability to accept or reject our suggestions and changes.

This certificate may be verified at:

Native English Edit

[www.birminghamresearchpark.co.uk/tenants/native-english-edit](http://www.birminghamresearchpark.co.uk/tenants/native-english-edit)

[www.NativeEnglishEdit.com](http://www.NativeEnglishEdit.com)

Birmingham Research Park

Edgbaston

Birmingham B15 2SQ

United Kingdom
